# Supplementary material for: Electrostatic sprayed Cr-loaded NiO core-in-hollow-shell structured micro/nanospheres with ultra-selectivity and sensitivity for xylene
Source: Royal Society of Chemistry journal article supplement (doi:10.1039/c4ce00969j), 2014-06-24
Supplement: c4ce00969j1.pdf [file c4ce00969j1.pdf]

## **Electronic Supplementary Information for**

### **Electrostatic sprayed Cr-loaded NiO core-in-hollow-shell structured micro/nanospheres with ultra-selectivity and sensitivity of xylene**

**Jing Cao, Ziyang Wang, Rui Wang\* and Tong Zhang\***

State Key Laboratory on Integrated Optoelectronics, College of Electronic Science and  
Engineering, Jilin University, Changchun 130012,

\* Corresponding author. E-mail address: zhangtong@jlu.edu.cn; wangrui@jlu.edu.cn

---

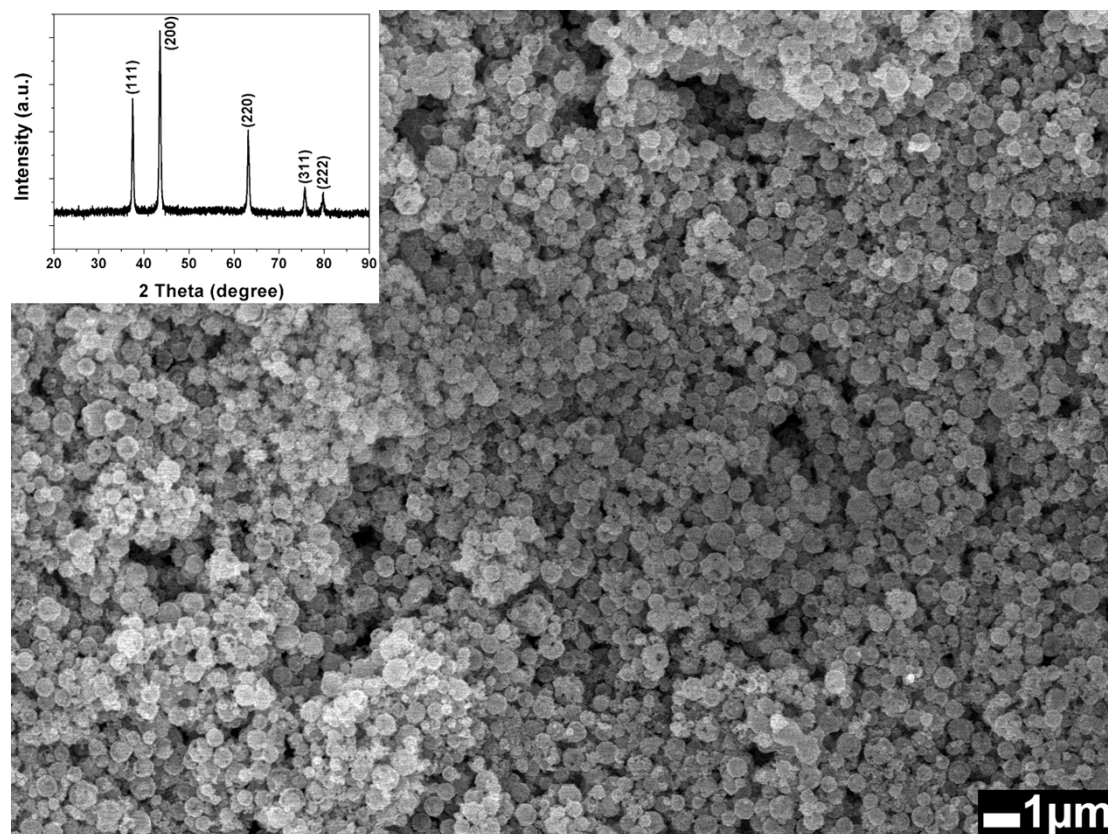

Fig. S1 SEM image of 1.5% Cr-loaded NiO core-in-hollow shell structured micro/nanospheres after pasted onto the gas sensor. [Inset](#) is the corresponding X-ray diffraction (XRD) pattern.
